# Supplementary material
Source: Springer Nature journal article supplement (https://www.springermedizin.de/resource/supplementary/12936_2011_1810_MOESM2_ESM.pdf/9541780)

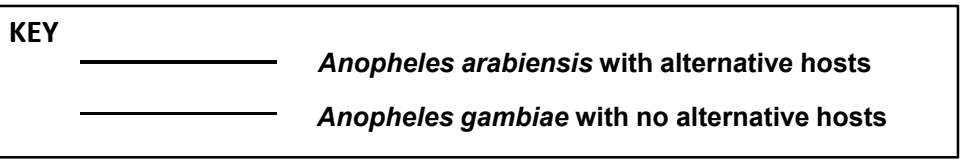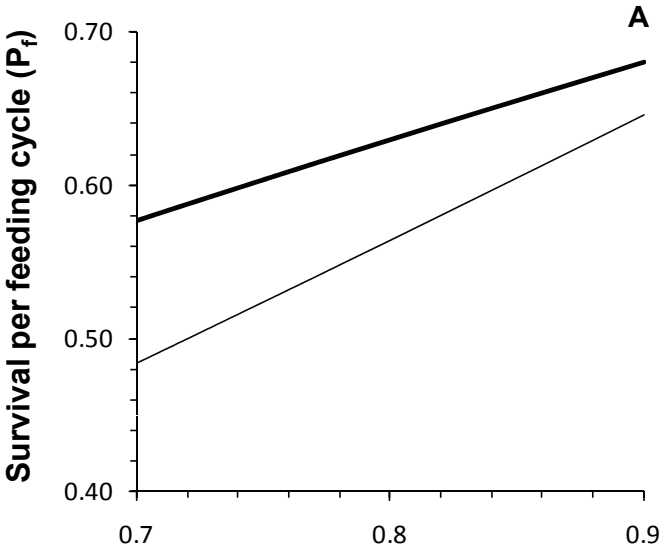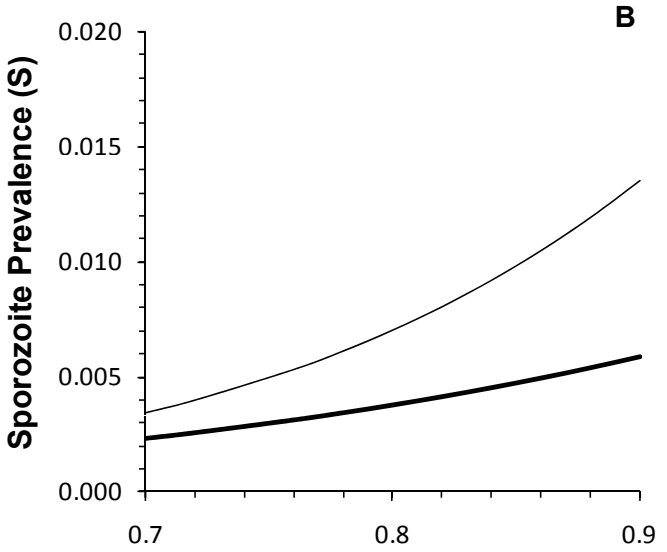

Daily survival while foraging for vertebrate blood or oviposition resources ( $P_{ov}$ )

Supplement: MOESM2 [file 9541780]
